# Supplementary material for: Ten-dimensional hyphenation including simulated static gastro-intestinal digestion on the adsorbent surface, planar assays, and bioactivity evaluation for meal replacement products
Source: Royal Society of Chemistry journal article supplement (doi:10.1039/d2fo02610d), 2022-11-24
Supplement: d2fo02610d1.pdf [file d2fo02610d1.pdf]

## Supplementary Information

### **Ten-dimensional hyphenation including simulated static gastrointestinal digestion on the adsorbent surface, planar assays, and bioactivity evaluation for meal replacement products**

*Tamara Schreiner, Naila Margot Eggerstorfer, Gertrud Elisabeth Morlock\**

Justus Liebig University Giessen, Institute of Nutritional Science, Chair of Food Science,  
Heinrich-Buff-Ring 26-32, 35392 Giessen, Germany

\*Corresponding author. Tel.: +49 641 9939141, fax: +49 641 9939149, E-mail address:  
Gertrud.Morlock@uni-giessen.de (G.E. Morlock)

## Table of contents

|          |                                                                                                                                                                                                                                                                                                                                                                                                             |
|----------|-------------------------------------------------------------------------------------------------------------------------------------------------------------------------------------------------------------------------------------------------------------------------------------------------------------------------------------------------------------------------------------------------------------|
| Page S–3 | <b>Table S1.</b> Studied meal replacement products with flavour, expiration date, ingredients, and sample weights ( <i>W</i> ), extracted with 5 mL <i>n</i> -butanol and filtered through a 0.45 µm cellulose acetate filter                                                                                                                                                                               |
| Page S–4 | <b>Table S2.</b> Ingredients and nutritional values of the six investigated MRPs                                                                                                                                                                                                                                                                                                                            |
| Page S–5 | <b>Fig. S1.</b> NP-HPTLC–FLD of eight fatty acids (C10:0–C18:3), monoacylglycerols (MAGs), diacylglycerols (DAGs), and triacylglycerols (TAGs) applied (10 µg/band each) on HPTLC plate silica gel 60 F <sub>254</sub> MS-grade, developed with <i>n</i> -hexane – diethyl ether – formic acid (70:30:2, V/V/V) up to 60 mm and detected after chemical derivatisation with rhodamine 6G (0.1% in ethanol). |

**Table S1.** Studied meal replacement products with flavour, expiration date, ingredients, and sample weights (*W*), extracted with 5 mL *n*-butanol and filtered through a 0.45 µm cellulose acetate filter

| <b>Flavor</b> | <b>Best before</b> | <b>Ingredients</b>                                                                                                                                                                                                                                                                                                                                                                                                                                                                  | <b>W [g]</b> |
|---------------|--------------------|-------------------------------------------------------------------------------------------------------------------------------------------------------------------------------------------------------------------------------------------------------------------------------------------------------------------------------------------------------------------------------------------------------------------------------------------------------------------------------------|--------------|
| Vanilla       | 03/19/2022         | milk protein, vegetable oils (sunflower, rapeseed), chicory root fibre, coconut milk, gluten-free oat fibre, vitamins (A, C, D, E, K, B1, B3, B5, B6, folic acid, biotin), minerals (potassium, magnesium, iron, zinc, copper, manganese, selenium, chromium, molybdenum, chloride, iodine), modified starch, maltodextrin, sweetener sucralose; natural flavourings.                                                                                                               | 5.00         |
| Choco         | 03/19/2022         | milk protein, vegetable oils (sunflower, rapeseed), fat-reduced cocoa 7.3%, chicory root fibre, coconut milk, gluten-free oat fibre, vitamins (A, C, D, E, K, B1, B3, B5, B6, folic acid, biotin), minerals (potassium, magnesium, iron, zinc, copper, manganese, selenium, chromium, molybdenum, chloride, iodine), modified starch, maltodextrin, sweetener sucralose; natural flavourings.                                                                                       | 5.00         |
| Berry         | 03/19/2022         | milk protein, vegetable oils (sunflower, rapeseed), chicory root fibre, coconut milk, gluten-free oat fibre, raspberry puree 0.2%, dried strawberries 0.2%, vitamins (A, C, D, E, K, B1, B3, B5, B6, folic acid, biotin), minerals (potassium, magnesium, iron, zinc, copper, manganese, selenium, chromium, molybdenum, chloride, iodine), modified starch, maltodextrin, sweetener sucralose; colouring beetroot concentrate; acidity regulator citric acid; natural flavourings. | 5.09         |
| Coffee        | 03/11/2022         | milk protein, vegetable oils (sunflower, rapeseed), chicory root fibre, coffee extract 3.2%, coconut milk, gluten-free oat fibre, vitamins (A, C, D, E, K, B1, B3, B5, B6, folic acid, biotin), minerals (potassium, magnesium, iron, zinc, copper, manganese, selenium, chromium, molybdenum, chloride, iodine), modified starch, maltodextrin, sweetener sucralose; natural flavourings.                                                                                          | 5.02         |
| Banana        | 03/11/2022         | milk protein, vegetable oils (sunflower, rapeseed), chicory root fibre, coconut milk, gluten-free oat fibre, banana powder 0.2%, vitamins (A, C, D, E, K, B1, B3, B5, B6, folic acid, biotin), minerals (potassium, magnesium, iron, zinc, copper, manganese, selenium, chromium, molybdenum, chloride, iodine), modified starch, maltodextrin, sweetener sucralose; natural flavourings.                                                                                           | 5.04         |
| Coconut       | 03/19/2022         | milk protein, vegetable oils (sunflower, rapeseed), chicory root fibre, gluten-free oat fibre, coconut milk 0.4%, vitamins (A, C, D, E, K, B1, B3, B5, B6, folic acid, biotin), minerals (potassium, magnesium, iron, zinc, copper, manganese, selenium, chromium, molybdenum, chloride, iodine), modified starch, maltodextrin, sweetener sucralose; natural flavourings.                                                                                                          | 5.10         |

**Table S2.** Ingredients and nutritional values of the six investigated MRPs

| <b>Nutrients</b>            | <b>Nutritional values*</b> |
|-----------------------------|----------------------------|
| Calories [kcal]             | 400.00 ± 0                 |
| Carbohydrates [g]           | 30.33 ± 0.47               |
| of which sugars [g]         | 15.17 ± 0.69               |
| Protein [g]                 | 25.00 ± 0                  |
| Fat [g]                     | 18.17 ± 0.37               |
| of which saturated fats [g] | 2.42 ± 0.09                |
| Fiber [g]                   | 6.62 ± 0.47                |
| Salt [g]                    | 0.53 ± 0                   |
| <b>Vitamins</b>             |                            |
| Vitamin A [µg]              | 241.00 ± 0                 |
| Vitamin D [µg]              | 1.50 ± 0                   |
| Vitamin E [mg]              | 3.60 ± 0                   |
| Vitamin K [µg]              | 23.00 ± 0                  |
| Vitamin C [mg]              | 24.00 ± 0                  |
| Thiamin [mg]                | 0.33 ± 0                   |
| Riboflavin [mg]             | 0.70 ± 0                   |
| Niacin [mg]                 | 4.80 ± 0                   |
| Vitamin B6 [mg]             | 0.42 ± 0                   |
| Folic acid [µg]             | 60.40 ± 0                  |
| Vitamin B12 [µg]            | 1.20 ± 0                   |
| Biotin [µg]                 | 20.00 ± 0                  |
| Pantothenic acid [mg]       | 1.80 ± 0                   |
| <b>Minerals</b>             |                            |
| Potassium [mg]              | 633.33 ± 74.54             |
| Chloride [mg]               | 240.00 ± 0                 |
| Calcium [mg]                | 722.67 ± 2.98              |
| Phosphorus [mg]             | 498.83 ± 13.04             |
| Magnesium [mg]              | 119.17 ± 13.79             |
| Iron [mg]                   | 4.55 ± 0.78                |
| Zinc [mg]                   | 3.00 ± 0                   |
| Copper [mg]                 | 0.34 ± 0.09                |
| Manganese [mg]              | 0.60 ± 0                   |
| Selenium [µg]               | 17.00 ± 0                  |
| Chromium [µg]               | 12.00 ± 0                  |
| Molybdenum [µg]             | 15.00 ± 0                  |
| Iodine [µg]                 | 45.22 ± 0.04               |

\*Values were calculated as mean ± standard deviation per portion (300 mL).

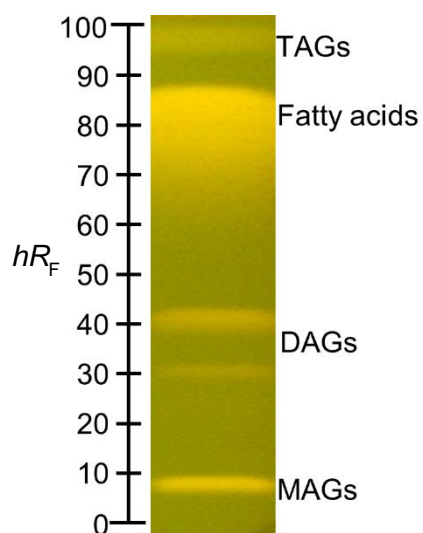

**Fig. S1.** NP-HPTLC–FLD of eight fatty acids (C10:0–C18:3), monoacylglycerols (MAGs), diacylglycerols (DAGs), and triacylglycerols (TAGs) applied (10  $\mu\text{g}$ /band each) on HPTLC plate silica gel 60 F<sub>254</sub> MS-grade, developed with *n*-hexane – diethyl ether – formic acid (70:30:2, V/V/V) up to 60 mm and detected after chemical derivatisation with rhodamine 6G (0.1% in ethanol).
